# Supplementary material for: Room temperature solvent-free reduction of SiCl4 to nano-Si for high-performance Li-ion batteries
Source: Royal Society of Chemistry journal article supplement (doi:10.1039/c7cc02857a), 2017-01-01
Supplement: c7cc02857a1.pdf [file c7cc02857a1.pdf]

## Electronic Supplementary Information

# Room temperature solvent-free reduction of SiCl<sub>4</sub> to nano-Si for high-performance Li-ion batteries

Zhiliang Liu<sup>a</sup>, Xinghua Chang<sup>a, b</sup>, Bingxue Sun<sup>a</sup>, Sungjin Yang<sup>a</sup>, Jie Zheng<sup>\*a</sup>, Xingguo Li<sup>\*a</sup>

<sup>a</sup> Beijing National Laboratory for Molecular Sciences (BNLMS), The State Key Laboratory of Rare Earth Materials Chemistry and Applications, College of Chemistry and Molecular Engineering, Peking University, 5 Yiheyuan Road, Beijing, 100871, P.R. China. E-mail: jiezheng@pku.edu.cn, xgli@pku.edu.cn

<sup>b</sup> Academy for Advanced Interdisciplinary Studies, Peking University, Beijing 100871, China

## Experimental Section

### *Preparation of nano-Si*

All reagents are used without further purification. SiCl<sub>4</sub> is purchased from Energy Chemical Co. Na metal was purchased from Sinopharm Chemical Reagent Co. Ltd. In a typical procedure, stoichiometric SiCl<sub>4</sub> liquid (3.6 g), Na metal (1.95 g) and steel beads are loaded in stainless steel vessel. Ball-to-powder mass ratio is 10:1. Then, the mixture is milled in a vibratory miller (QM-3B, 180 W, Nanjing Nanda Instruments) for 1 h under pure argon atmosphere. After milling, dry brownish powder is obtained and simply washed with deionized water to remove NaCl. The obtained sample is immersed in 5 wt% hydrofluoric acid solution for 5 min and washed by two times using ethanol. Finally, the product is dried in vacuum at 60 °C for 3 h.

### *Characterization*

The samples are characterized by X-ray diffraction (XRD, PANalytical X'Pert3 Powder, Cu K $\alpha$ ), Raman spectroscopy (Jobin Yvon LabRam ARAMIS), scanning electron microscopy (SEM, Hitachi S4800), transmission electron microscopy (TEM, Tecnai F20 and HRTEM, Tecnai F20) and X-ray photoelectron spectroscopy (XPS, AXIS-Ultra spectrometer, Kratos Analytical).

#### *Electrochemistry measurements*

To prepare the working electrode, a slurry containing nano-Si, acetylene black and carboxymethyl cellulose ( $M_w=90,000$ ) in mass ratio of 60:20:20 thoroughly mixed in water is pasted onto a Cu foil and dried in vacuum at 60 °C for 3 h. Coin type half-cells are assembled in an argon-filled glove-box, using a lithium foil counter electrode, 1 M LiPF<sub>6</sub> in ethylene carbonate/dimethyl carbonate = 1/1 in volume with 5 wt% fluoroethylene carbonate (FEC) as the electrolyte and polypropylene film (Celgard 2400) as the separator. The cells are tested in the voltage range of 0.005 – 1.5 V (versus Li/Li<sup>+</sup>) at ambient temperature. Cyclic voltammetry is carried out at a scan rate of 0.2 mV·s<sup>-1</sup>. The specific capacities reported are on the mass of Si.

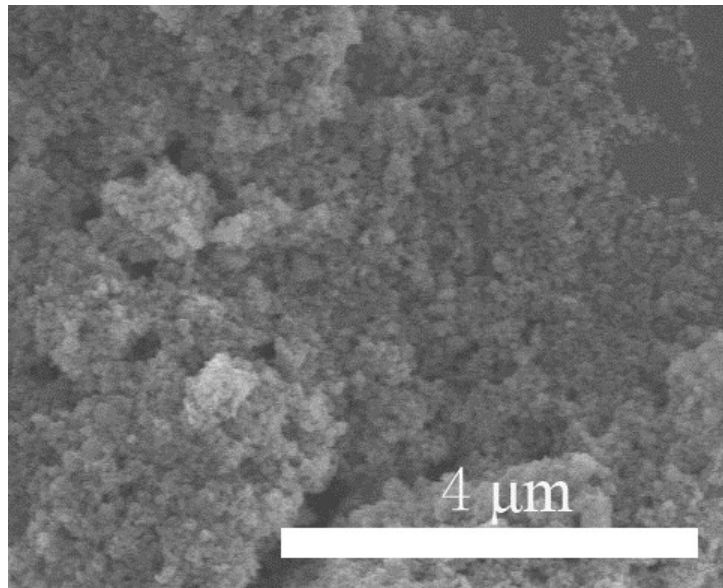

**Figure S1.** A low magnification SEM image of the obtained nano-Si, show absence of large particles in a large scope

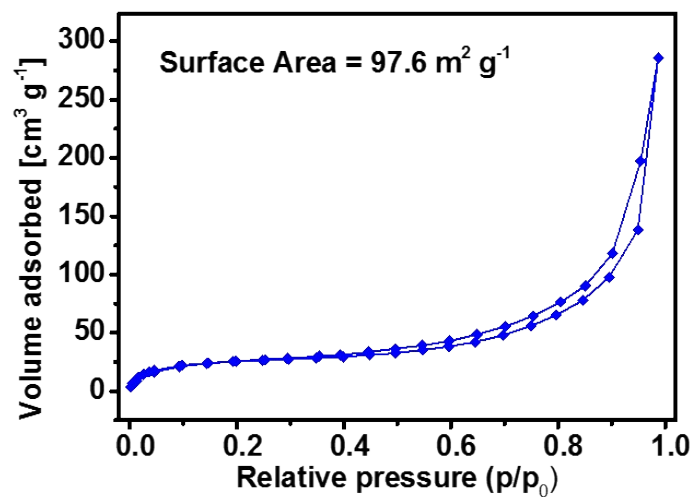

**Figure S2.** The N<sub>2</sub> sorption isotherm of the obtained nano-Si

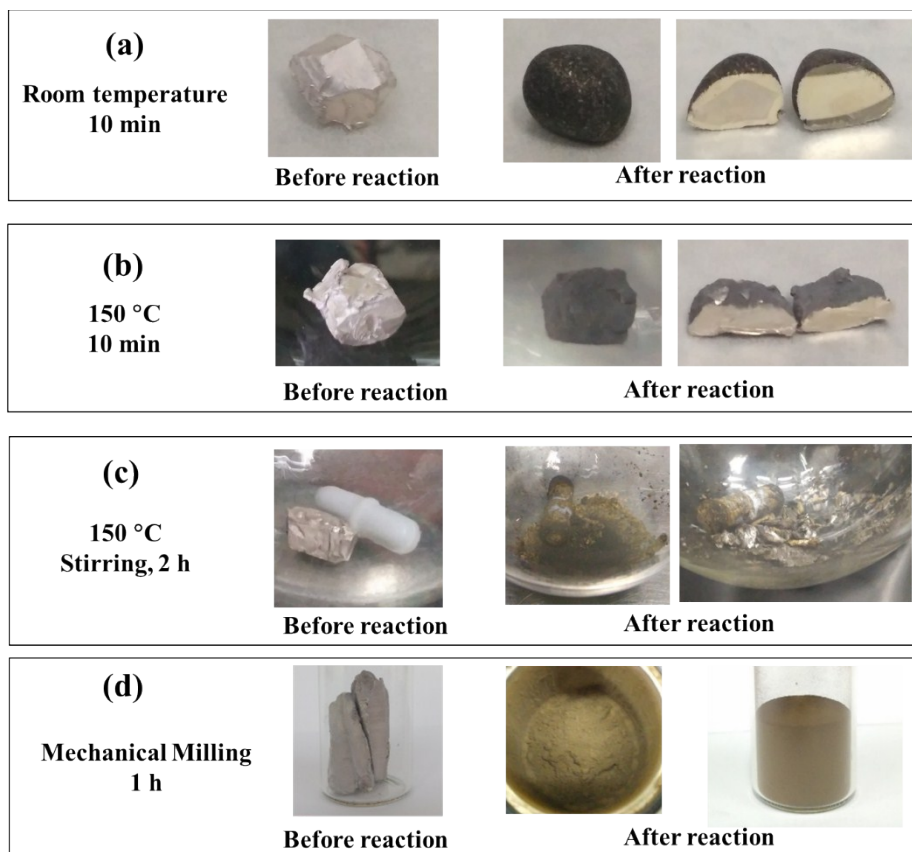

**Figure S3.** Photographs showing the result of four typical reaction conditions. (a) Direct reaction at room temperature, (b) Direct reaction at 150 °C, (c) Stirring at 150 °C and (d) Mechanical milling for 1 h.

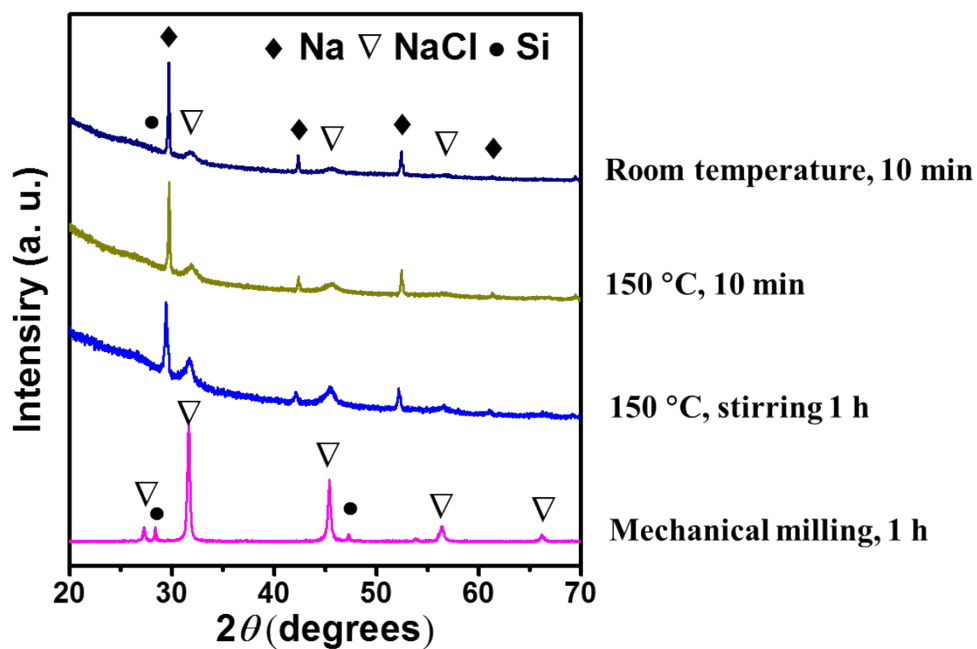

**Figure S4.** XRD patterns of the products obtained in four typical reaction conditions. Only mechanical milling results in complete conversion of Na metal.

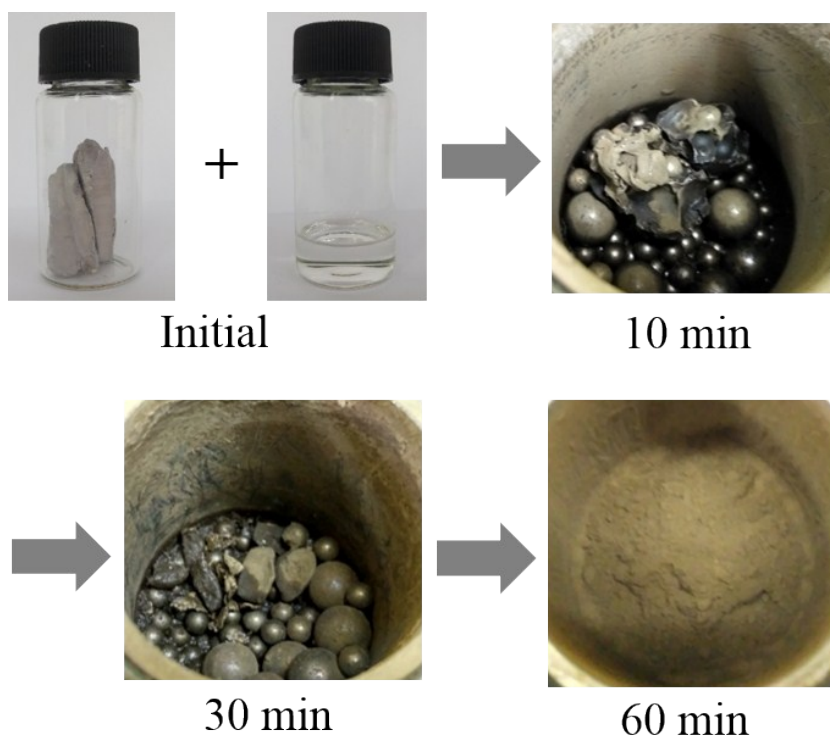

**Figure S5.** Photographs showing the reaction at different stages during the mechanical milling process.

**Table S1.** SiCl<sub>4</sub> reduction by solution based methods reported in literature

| Solvent            | Reducing agent              | Reaction condition                                                                  | Ref |
|--------------------|-----------------------------|-------------------------------------------------------------------------------------|-----|
| THF                | Naphthalene sodium          | 380 °C, high pressure,<br>(CH <sub>3</sub> ) <sub>3</sub> (dodecyl)NBr,<br>Ar, 24 h | 1   |
| Glyme              | Naphthalene sodium          | Ar, 24 h                                                                            | 2   |
| THF                | Sodium<br>cyclopentadienide | Ar, 7 h                                                                             | 3   |
| THF                | Crown ether<br>potassium    | Ar, 20 h                                                                            | 4   |
| Toluene            | Liquid NaK alloy            | Reflex, Ar, 4 h                                                                     | 5   |
| Toluene            | Na dispersion liquid        | 385 °C, >100atm, Ar,<br>72-168 h                                                    | 6   |
| Glyme              | KSi                         | Reflex, N <sub>2</sub> , 48-96 h                                                    | 7   |
| Glyme              | NaSi                        | Reflex, Ar, 24 h                                                                    | 8   |
| Toluene<br>and THF | LiAlH <sub>4</sub>          | Sonication, (Octyl) <sub>4</sub> NBr,<br>Ar, 3 h                                    | 9   |

**Table S2.** Performance comparison between our pristine nano-Si anode with the state of the art pristine Si based anodes

| Anode materials         | Size (nm) | Current density (A·g <sup>-1</sup> ) | Cycles         | Gravimetric capacity (mAh g <sup>-1</sup> ) | Volumetric capacity (mAh cm <sup>-3</sup> ) | Ref             |
|-------------------------|-----------|--------------------------------------|----------------|---------------------------------------------|---------------------------------------------|-----------------|
| Si nanoparticles        | 35        | 4.2                                  | 100            | 1700                                        | 850                                         | 10              |
| Si nanoparticles        | 50        | 3.0                                  | 1000           | 900                                         | Not reported                                | 11              |
| Si nanoparticles        | 10        | 0.9                                  | 40             | 2900                                        | Not reported                                | 1               |
| Si nanotube             | 40        | 0.84                                 | 900            | 1300                                        | 1460                                        | 12              |
| Si nanowire             | 70        | 2.1                                  | 200            | 1706                                        | 1023                                        | 13              |
| Si nanowires            | 100       | 0.14                                 | 100            | 676                                         | 1014                                        | 14              |
| Si hollow sphere        | 80        | 2.0                                  | 100            | 1318                                        | Not reported                                | 15              |
| Porous Si               | 50        | 3.6                                  | 500            | 1100                                        | Not reported                                | 16              |
| Porous Si               | 60        | 0.2                                  | 300            | 952                                         | Not reported                                | 17              |
| <b>Si nanoparticles</b> | <b>25</b> | <b>2.1</b>                           | <b>100/500</b> | <b>1950/1600</b>                            | <b>1560/1280</b>                            | <b>Our work</b> |



## References

1. K. Hyejung, S. Minho, P. Mi-Hee and C. Jaephil, *Angew Chem Int Ed*, **2010**, *49*, 2146-2149.
2. Q. Li, T.-Y. Luo, M. Zhou, H. Abroshan, J. Huang, H. J. Kim, N. L. Rosi, Z. Shao and R. Jin, *ACS Nano*, **2016**, *10*, 8385-8393.
3. M. H. Balci, R. Saeterli, J. Maria, M. Lindgren, R. Holmestad, T. Grande and M.-A. Einarsrud, *Dalton Trans.*, **2013**, *42*, 2700-2703.
4. M. Sletnes, J. Maria, T. Grande, M. Lindgren and M. A. Einarsrud, *Dalton Trans.*, **2014**, *43*, 2127-2133.
5. F. Dai, R. Yi, M. L. Gordin, S. Chen and D. Wang, *RSC Adv.*, **2012**, *2*, 12710-12713.
6. J. R. Heath, *Science*, **1992**, *258*, 1131-1133.
7. R. A. Bley and S. M. Kauzlarich, *J. Am. Chem. Soc.*, **1996**, *118*, 12461-12462.
8. D. Mayeri, B. L. Phillips, M. P. Augustine and S. M. Kauzlarich, *Chem. Mater.*, **2001**, *13*, 765-770.
9. M. Rosso-Vasic, E. Spruijt, B. van Lagen, L. De Cola and H. Zuilhof, *Small*, 2008, *4*, 1835-1841.
10. I. Kovalenko, B. Zdyrko, A. Magasinski, B. Hertzberg, Z. Milicev, R. Burtovyy, I. Luzinov and G. Yushin, *Science (Washington, DC, U. S.)*, **2011**, *334*, 75-79.
11. N. Lin, Y. Han, J. Zhou, K. Zhang, T. Xu, Y. Zhu and Y. Qian, *Energy Environ. Sci.*, **2015**, *8*, 3187-3191.
12. H. Wu, G. Chan, J. W. Choi, I. Ryu, Y. Yao, M. T. McDowell, S. W. Lee, A. Jackson, Y. Yang, L. Hu and Y. Cui, *Nat. Nanotechnol.*, **2012**, *7*, 310-315.
13. J.-H. Cho and S. T. Picraux, *Nano Lett.*, **2013**, *13*, 5740-5747.
14. S. Jeong, J.-P. Lee, M. Ko, G. Kim, S. Park and J. Cho, *Nano Lett*, **2013**, *13*, 3403-3407.
15. Z.-W. Zhou, Y.-T. Liu, X.-M. Xie and X.-Y. Ye, *Chem. Commun. (Cambridge, U. K.)*, **2016**, *52*, 8401-8404.
16. X. Zhou, L. Wu, J. Yang, J. Tang, L. Xi and B. Wang, *J Power Sources*, **2016**, *324*, 33-40.
17. X. Zuo, Y. Xia, Q. Ji, X. Gao, S. Yin, M. Wang, X. Wang, B. Qiu, A. Wei, Z. Sun, Z. Liu, J. Zhu and Y.-J. Cheng, *ACS Nano*, **2017**, *11*, 889-899.
